# Supplementary material
Source: PubMed Central journal article supplement (PMC3515698)
Supplement: NIHMS415769-supplement-Supp_FigureS1-S3.pdf [file NIHMS415769-supplement-Supp_FigureS1-S3.pdf]

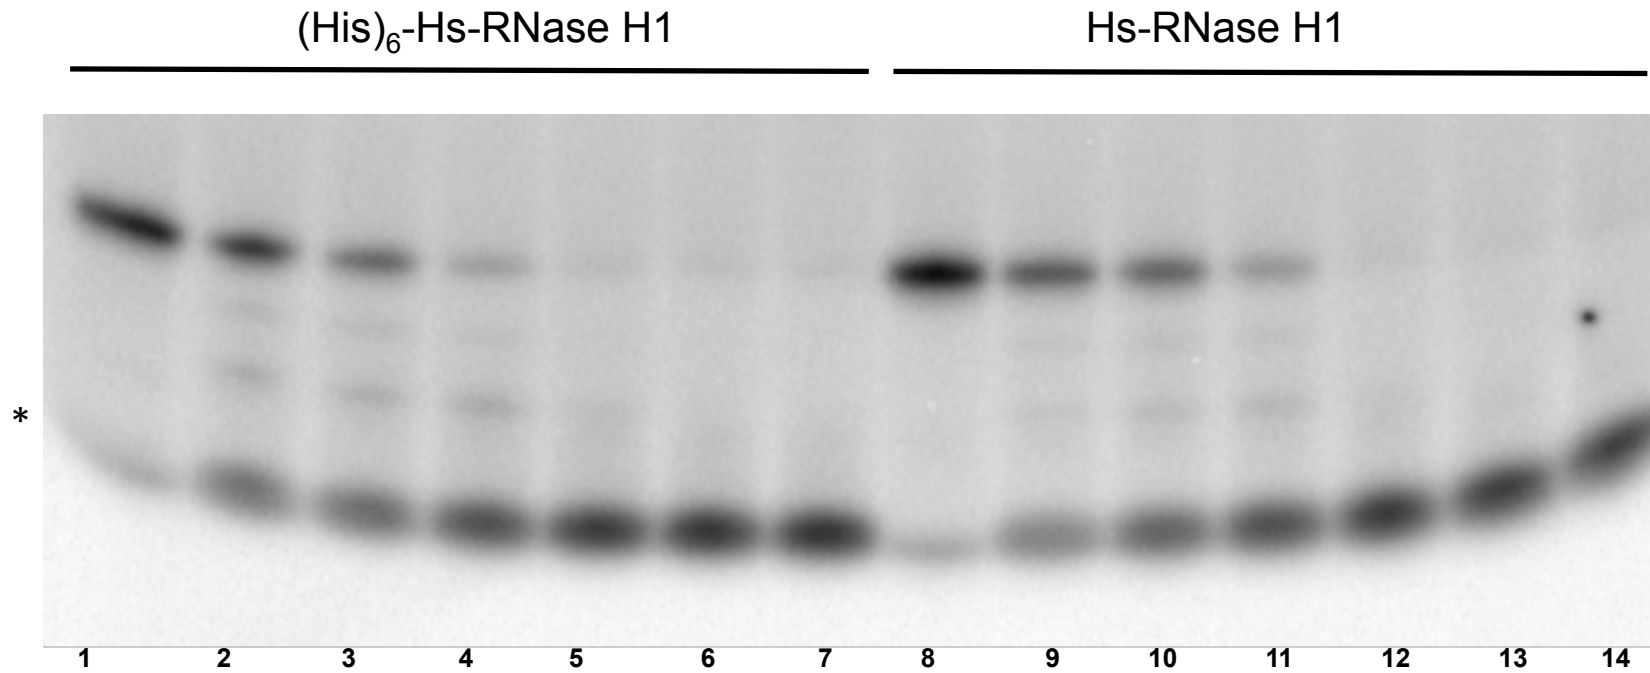

**Supplemental Figure S2. Comparison of hybrid substrate cleavage by Hs-RNase H1 with or without an N-terminal (His)<sub>6</sub> affinity tag.** Hs-RNase H1 was purified and the (His)<sub>6</sub> tag removed as described in *Materials and Methods*. “(His)<sub>6</sub>-Hs-RNase H1” refers to enzyme that was mock-treated with thrombin and purified in the same manner as the thrombin-treated enzyme (“Hs-RNase H1”). Cleavage assays used 100 nM (preformed) 5'-<sup>32</sup>P-labeled hybrid substrate and 30 nM enzyme in the standard assay buffer (see *Materials and Methods*). Lanes 2-7, and lanes 9-14 represent 0.5, 1, 2.5, 5, 10, and 30 min time points for (His)<sub>6</sub>-Hs-RNase H1 and Hs-RNase H1 reaction, respectively. Lanes 1 and 8 are control reactions lacking Mg<sup>2+</sup> that were incubated for 30 min. The asterisk on the left hand side indicates the position of a nonenzymatic cleavage product that is present in lanes 1 and 8. See Supplemental Fig. S1 for identification of the stable products.

**A**

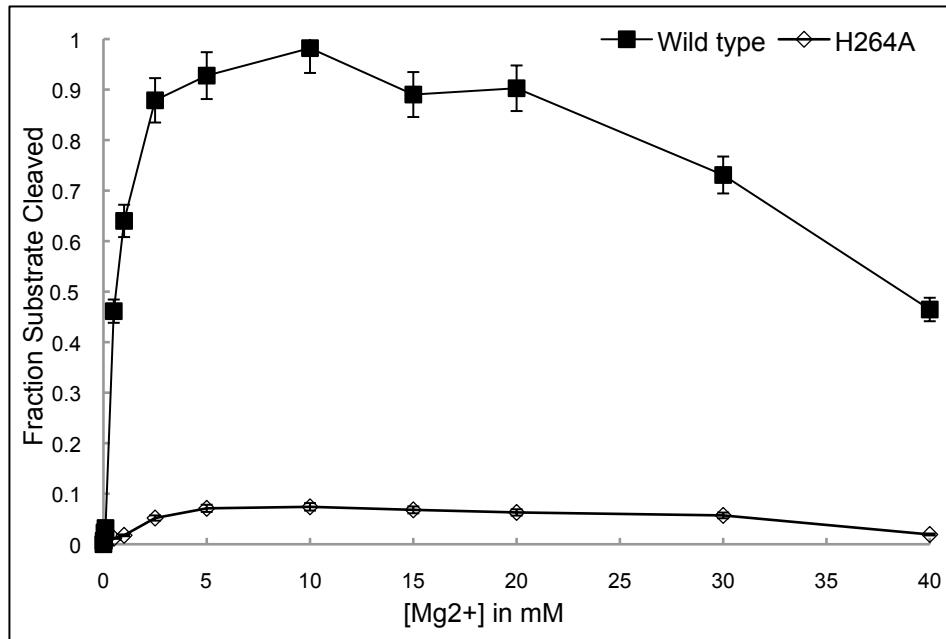

**B**

| Mg <sup>2+</sup> concentration ratio (mM/mM) | WT   | H264A |
|----------------------------------------------|------|-------|
| 15 / 10                                      | 0.90 | 0.92  |
| 20 / 10                                      | 0.92 | 0.85  |
| 30 / 10                                      | 0.74 | 0.77  |
| 40 / 10                                      | 0.47 | 0.26  |
| 60 / 10                                      | 0.15 | 0.09  |

**Supplemental Figure S3. Comparison of the Mg<sup>2+</sup> titration behavior of Hs-RNase H1 and the H264A mutant enzyme.** Panel A shows the fraction of heteroduplex substrate cleaved as a function of Mg<sup>2+</sup> ion concentration, using either WT or H264A mutant Hs-RNase H1. The data for the wt enzyme are from Figure 2, and the experimental conditions are provided in the Figure 2 legend. Panel B provides the ratios of the fraction of substrate cleaved, as determined by dividing the value at each Mg<sup>2+</sup> concentration (15, 20, 30, 40, 50 mM) by the value obtained at 10 mM Mg<sup>2+</sup>, for both WT and H264A mutant enzymes. Note that the H264A mutant is inhibited to a greater extent by higher Mg<sup>2+</sup> concentrations.
